# Supplementary material for: Sustainable utilization of natural sands for cleaner preparation of high-performance nanostructured cobalt blue composite pigments by dolomite-induced mechanochemistry
Source: Royal Society of Chemistry journal article supplement (doi:10.1039/d2su00146b), 2023-01-01
Supplement: d2su00146b1.pdf [file d2su00146b1.pdf]

**Sustainable utilization of natural sands for cleaner preparation of high-performance nanostructured cobalt blue composite pigments by dolomite-induced mechanochemistry**

Hao Yang <sup>a,b</sup>, Bin Mu <sup>a,b\*</sup>, Tenghe Zhang <sup>a,b</sup>, Yushen Lu <sup>a</sup>, Aiqin Wang <sup>a,b\*</sup>

*<sup>a</sup> Key Laboratory of Clay Mineral Applied Research of Gansu Province, Center of Eco-material and Green Chemistry, Lanzhou Institute of Chemical Physics, Chinese Academy of Sciences, Lanzhou 730000, P. R. China*

*<sup>b</sup> Center of Materials Science and Optoelectronics Engineering, University of Chinese Academy of Sciences, Beijing 100049, P. R. China.*

---

\*Corresponding authors. E-mail addresses: [mubin@licp.cas.cn](mailto:mubin@licp.cas.cn) (B. Mu), [aqwang@licp.cas.cn](mailto:aqwang@licp.cas.cn) (A. Wang); Fax: +86 931 4068019; Tel: +86 931 4868118.

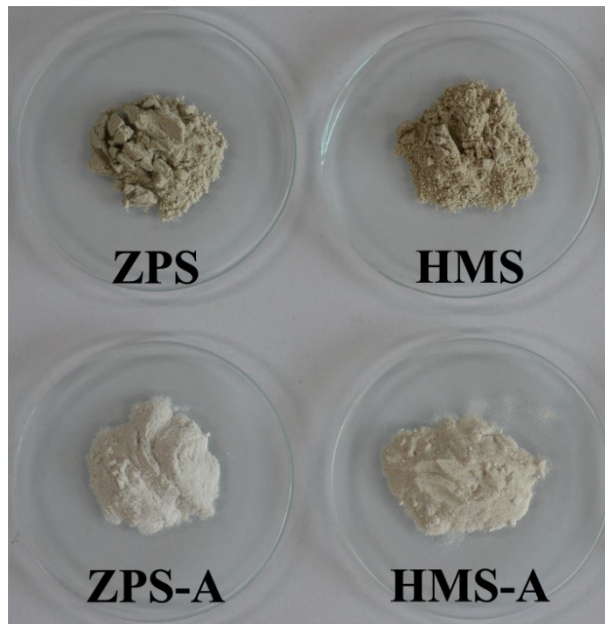

**Figure S1** Digital images of ZPS, ZPS-A, HMS and HMS-A.

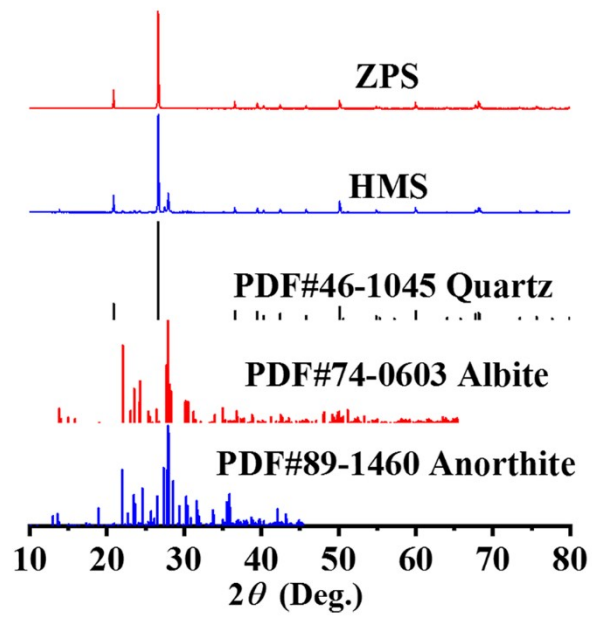

**Figure S2** XRD patterns of ZPS and HMS as well as corresponding PDF card

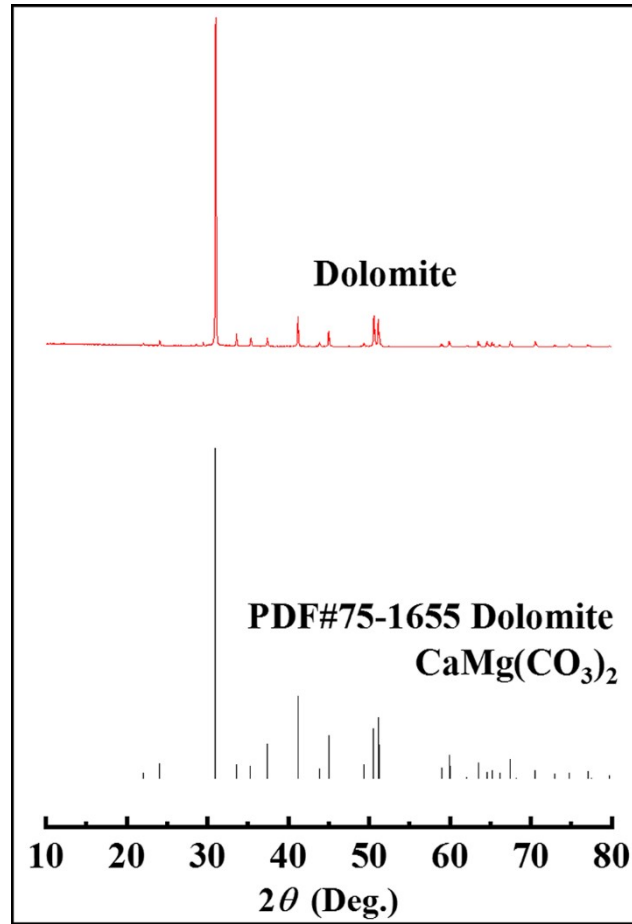

Figure S3 XRD pattern of dolomite and corresponding PDF card

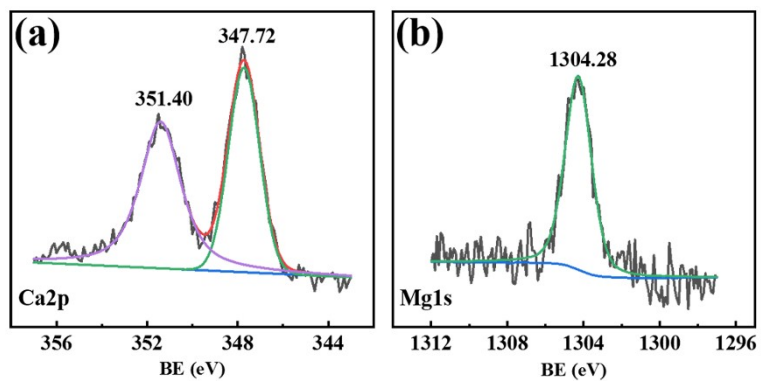

Figure S4 High-resolution XPS spectra of (a) Ca2p and (b) Mg1s of dolomite.

**Table S1** XRF chemical compositions (wt%) of the involved dolomite

| Composition | CaO   | MgO    | SiO <sub>2</sub> | Fe <sub>2</sub> O <sub>3</sub> | CO <sub>2</sub> |
|-------------|-------|--------|------------------|--------------------------------|-----------------|
| Wt%         | 58.19 | 30.143 | 1.303            | 0.298                          | 10              |

**Table S2** XRF chemical compositions (wt%) of ZPS and HMs before and after acid treatment

| Samples | Acid treatment | SiO <sub>2</sub> | Al <sub>2</sub> O <sub>3</sub> | Na <sub>2</sub> O | K <sub>2</sub> O | MgO   | CaO   | Fe <sub>2</sub> O <sub>3</sub> | CO <sub>2</sub> |
|---------|----------------|------------------|--------------------------------|-------------------|------------------|-------|-------|--------------------------------|-----------------|
| ZPS     | Before         | 88.354           | -                              | 0.105             | 0.731            | -     | -     | 0.561                          | 10              |
|         | After          | 87.249           | 1.938                          | -                 | 0.569            | -     | -     | -                              | 10              |
| HMS     | Before         | 73.282           | 9.162                          | 2.500             | 1.916            | 0.482 | 1.143 | 1.307                          | 10              |
|         | After          | 74.979           | 8.796                          | 2.503             | 1.948            | 0.183 | 0.959 | 0.507                          | 10              |

**Table S3** The chroma parameters of CoAl<sub>2</sub>O<sub>4</sub> pigments compared between this study and other reports

| Samples                                                          | Synthetic methods     | Calcination temperature | Chroma parameters |            |            |            | Reference  |
|------------------------------------------------------------------|-----------------------|-------------------------|-------------------|------------|------------|------------|------------|
|                                                                  |                       |                         | <i>L</i> *        | <i>a</i> * | <i>b</i> * | <i>C</i> * |            |
| CP-D/CB/ZPS                                                      | Mechanochemistry      | 1100°C                  | 46.39             | 1.45       | -48.12     | 48.15      | This study |
| CP-D/CB/ZPS-A                                                    | Mechanochemistry      | 1100°C                  | 42.97             | 4.56       | -50.30     | 50.50      | This study |
| CP-D/CB/HMS                                                      | Mechanochemistry      | 1100°C                  | 44.55             | 0.19       | -45.69     | 45.69      | This study |
| CP-D/CB/HMS-A                                                    | Mechanochemistry      | 1100°C                  | 42.59             | 3.38       | -49.60     | 49.72      | This study |
| Pure CoAl <sub>2</sub> O <sub>4</sub>                            | Mechanochemistry      | 1100°C                  | 29.36             | -8.28      | -28.22     | 28.02      | House-made |
| CoAl <sub>2</sub> O <sub>4</sub>                                 | -                     | -                       | 39.70             | -1.22      | -44.63     | 44.65      | Commercial |
| Hibonite Blue                                                    | Solid phase           | 1350-1500°C             | 44.94             | 3.95       | -42.24     | 42.24      | [14]       |
| CoAl <sub>2</sub> O <sub>4</sub> /Al <sub>2</sub> O <sub>3</sub> | Co-precipitation      | 1100°C                  | 34.28             | -2.87      | -49.79     | 49.87      | [16]       |
| CoAl <sub>2</sub> O <sub>4</sub> /TiO <sub>2</sub>               | Co-precipitation      | 1100°C                  | 54.32             | -3.79      | -44.16     | 44.32-     | [34]       |
| CoAl <sub>2</sub> O <sub>4</sub>                                 | Electrospinning       | 1000°C                  | 50.59             | -12.30     | -40.98     | 42.78      | [35]       |
| CoAl <sub>2</sub> O <sub>4</sub>                                 | Combustion synthesis  | 1000°C                  | 57.19             | -1.99      | -34.03     | 34.09      | [36]       |
| CoAl <sub>2</sub> O <sub>4</sub>                                 | Hhydrothermal process | 1100°C                  | 47.31             | -18.32     | -37.60     | 41.83      | [37]       |

**Table S4** The binding energy of the fine spectra as well as corresponding assignment

| Samples                               | Fine spectra | Binding energy (eV) and assignment                                                              |
|---------------------------------------|--------------|-------------------------------------------------------------------------------------------------|
| ZPS-A                                 | Si2p         | 103.39 (Si-O), 102.14 (Si-O <sub>2</sub> )                                                      |
| Dolomite                              | Ca2p         | 351.40, 347.72 (dolomite)                                                                       |
|                                       | Mg1s         | 1304.28 (dolomite)                                                                              |
| Pure CoAl <sub>2</sub> O <sub>4</sub> | Co2p         | 781.53, 786.14, 797.07, 803.13 (CoAl <sub>2</sub> O <sub>4</sub> )                              |
|                                       | Al2p         | 74.26 (Al <sub>VI</sub> ), 73.71 (Al <sub>IV</sub> )                                            |
| Pre-D/CB/ZPS-A                        | Co2p         | 779.81, 787.07, 797.17, 803.27 (Co <sub>3</sub> O <sub>4</sub> )                                |
|                                       | Al2p         | 75.06 (Al <sub>2</sub> O <sub>3</sub> )                                                         |
|                                       | Ca2p         | 348.42, 352.13 (Ca(NO <sub>3</sub> ) <sub>2</sub> )                                             |
|                                       | Mg1s         | 1304.11 (Mg(NO <sub>3</sub> ) <sub>2</sub> )                                                    |
|                                       | Si2p         | 102.07 (SiO <sub>2</sub> ·Al <sub>2</sub> O <sub>3</sub> ), 103.07 (quartz)                     |
| D/CB/ZPS-A                            | N1s          | 407.83 (NO <sub>3</sub> <sup>-</sup> ), 400.13 (N-O-M)                                          |
|                                       | Co2p         | 781.77, 786.86, 797.34, 803.13 (CoAl <sub>2</sub> O <sub>4</sub> )                              |
|                                       | Al2p         | 75.07 (CaAl <sub>2</sub> O <sub>4</sub> ), 74.44 (Al <sub>VI</sub> ), 73.78 (Al <sub>IV</sub> ) |
|                                       | Ca2p         | 347.69, 348.60, 351.51, 352.03 (CaAl <sub>2</sub> O <sub>4</sub> )                              |
|                                       | Mg1s         | 1304.00 (MgAl <sub>2</sub> O <sub>4</sub> )                                                     |
|                                       | Si2p         | 102.12 (Si-O-Al), 102.84 (quartz)                                                               |
